# Supplementary material for: Revisiting the evolutionary trend toward the mammalian lower jaw in non-mammalian synapsids in a phylogenetic context
Source: PeerJ journal article supplement (doi:10.7717/peerj.15575), 2023-06-20
Supplement: Revise_PeerJ_Supplemental_Information_Fig_S2.pdf [file Revise_PeerJ_Supplemental_Information_Fig_S2.pdf]

Supplemental Information

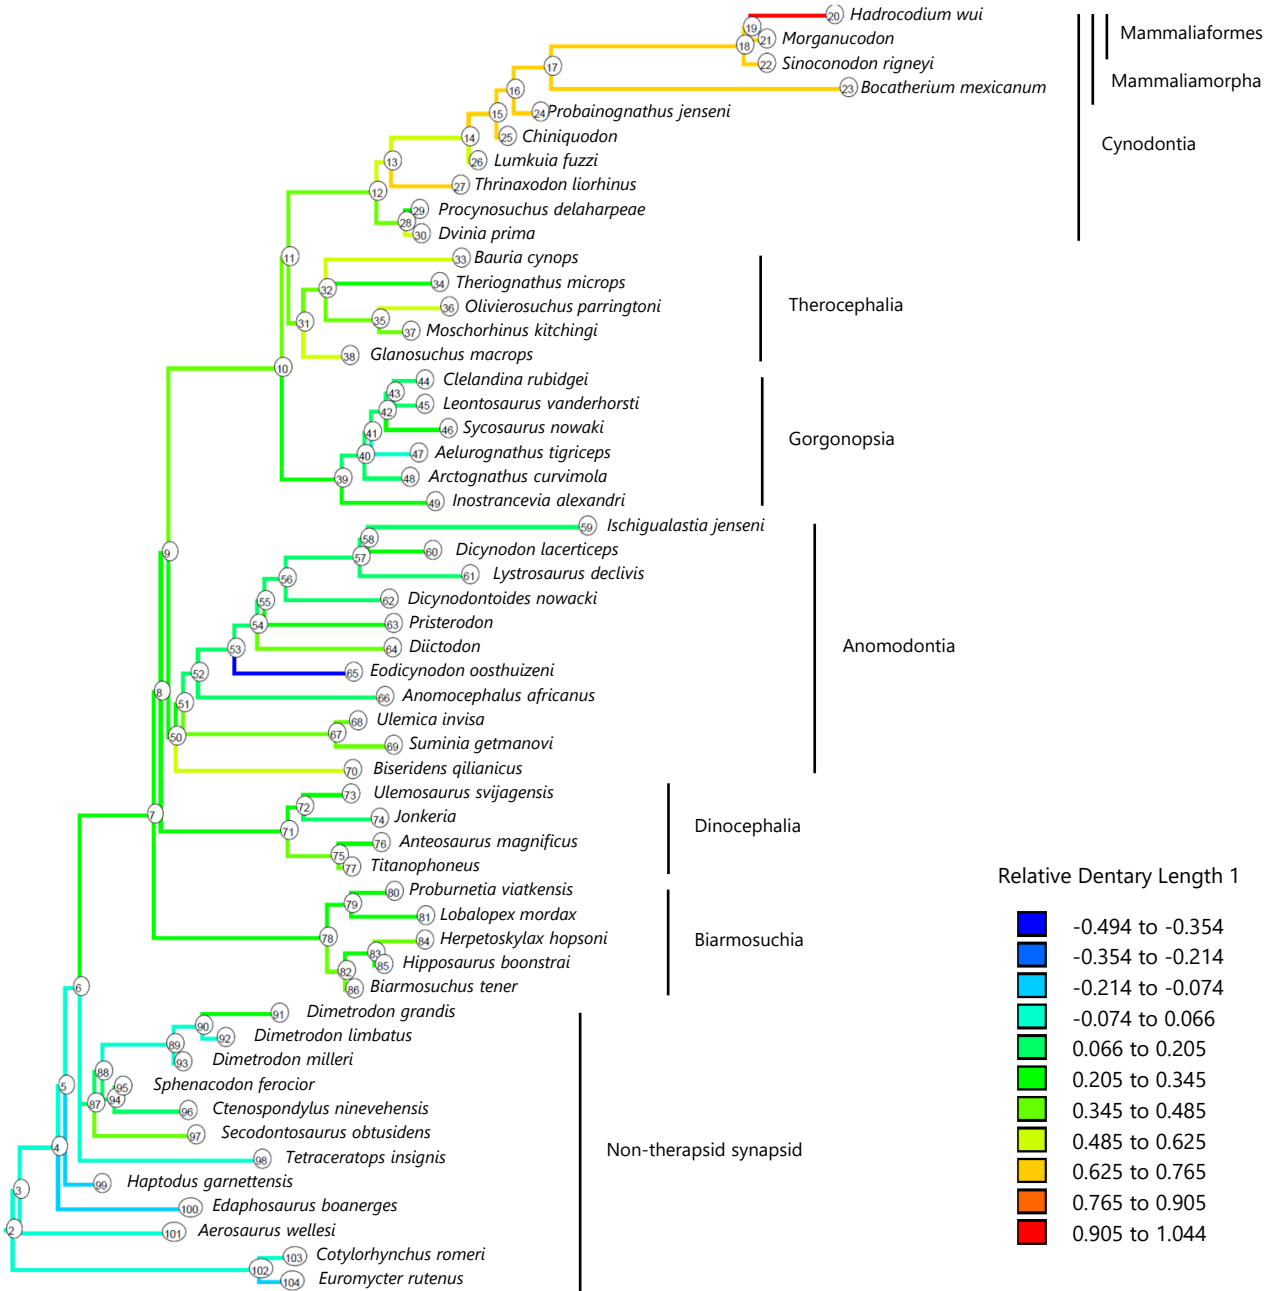

**Figure S2: Positions of the numbered nodes on the phylogenetic tree of non-mammalian synspsids, which is identical to Fig. 3. The node numbers correspond to those of Table S2.**
