# Supplementary material for: Revisiting the evolutionary trend toward the mammalian lower jaw in non-mammalian synapsids in a phylogenetic context
Source: PeerJ journal article supplement (doi:10.7717/peerj.15575), 2023-06-20
Supplement: Revise_PeerJ_Supplemental_Information_Table_S1.pdf [file Revise_PeerJ_Supplemental_Information_Table_S1.pdf]

## Supplemental Information

**Table S1** Estimates from phylogenetic generalized least squares (PGLS) models used to quantify the relative contribution of the dentary to the lower jaw for the ancestral state reconstructions in non-mammalian synapsids.

| Explanatory variable          | Estimate | SE    | t      | P      |
|-------------------------------|----------|-------|--------|--------|
| (A) Relative dentary area     |          |       |        |        |
| Intercept                     | -0.816   | 0.131 | -6.226 | <0.001 |
| Lower jaw area                | 0.995    | 0.015 | 68.244 | <0.001 |
| (B) Relative Dentary Length 1 |          |       |        |        |
| Intercept                     | -0.907   | 0.230 | -3.947 | <0.001 |
| Lower jaw length              | 0.990    | 0.042 | 23.769 | <0.001 |
| (C) Relative Dentary Length 2 |          |       |        |        |
| Intercept                     | -0.386   | 0.129 | -2.995 | <0.001 |
| Lower jaw length              | 1.018    | 0.023 | 43.593 | <0.001 |

PGLS models were performed assuming a standard Brownian motion (BM) model of trait evolution. (A) The relative dentary area was calculated as a residual from the PGLS regression of the dentary area (log) on the lower jaw area (log). (B) The relative Dentary Length 1 was calculated as a residual from the PGLS regression of the Dentary Length 1 (log) on the lower jaw length (log). (C) The relative Dentary Length 2 was calculated as a residual from the PGLS regression of the Dentary Length 2 (log) on the lower jaw length (log) (see Fig. 1 for definitions of positions and length measurements).
