# Supplementary material for: Revisiting the evolutionary trend toward the mammalian lower jaw in non-mammalian synapsids in a phylogenetic context
Source: PeerJ journal article supplement (doi:10.7717/peerj.15575), 2023-06-20
Supplement: Revise_PeerJ_Supplemental_Information_Table_S2.pdf [file Revise_PeerJ_Supplemental_Information_Table_S2.pdf]

Supplemental Information

**Table S2: Reconstructed ancestral states of the dentary area relative to the lower jaw at each node, which is numbered in Fig. S1.**

| Node | State at ancestor | State at node |
|------|-------------------|---------------|
| 3    | -0.000002         | -0.005325     |
| 4    | -0.005325         | -0.024700     |
| 5    | -0.024700         | -0.018373     |
| 6    | -0.018373         | 0.015044      |
| 7    | 0.015044          | 0.238365      |
| 8    | 0.238365          | 0.260565      |
| 9    | 0.260565          | 0.278204      |
| 10   | 0.278204          | 0.419660      |
| 11   | 0.419660          | 0.434876      |
| 12   | 0.434876          | 0.566074      |
| 13   | 0.566074          | 0.611453      |
| 14   | 0.611453          | 0.764883      |
| 15   | 0.764883          | 0.783157      |
| 16   | 0.783157          | 0.787222      |
| 17   | 0.787222          | 0.787051      |
| 18   | 0.787051          | 0.788029      |
| 19   | 0.788029          | 0.823346      |
| 20   | 0.788029          | 0.783679      |
| 21   | 0.787051          | 0.784096      |
| 22   | 0.787222          | 0.819598      |
| 23   | 0.783157          | 0.807506      |
| 24   | 0.764883          | 0.768877      |
| 25   | 0.611453          | 0.721820      |
| 26   | 0.566074          | 0.519992      |
| 27   | 0.519992          | 0.467192      |
| 28   | 0.519992          | 0.559061      |
| 29   | 0.434876          | 0.443147      |
| 30   | 0.443147          | 0.522522      |
| 31   | 0.443147          | 0.443506      |

|    |          |          |
|----|----------|----------|
| 32 | 0.419660 | 0.352570 |
| 33 | 0.352570 | 0.365594 |
| 34 | 0.365594 | 0.401791 |
| 35 | 0.365594 | 0.341319 |
| 36 | 0.352570 | 0.290097 |
| 37 | 0.278204 | 0.286613 |
| 38 | 0.286613 | 0.290577 |
| 39 | 0.290577 | 0.286045 |
| 40 | 0.286045 | 0.284572 |
| 41 | 0.284572 | 0.305106 |
| 42 | 0.305106 | 0.309330 |
| 43 | 0.309330 | 0.316300 |
| 44 | 0.316300 | 0.285839 |
| 45 | 0.285839 | 0.288853 |
| 46 | 0.288853 | 0.309821 |
| 47 | 0.288853 | 0.308568 |
| 48 | 0.285839 | 0.197018 |
| 49 | 0.316300 | 0.390150 |
| 50 | 0.309330 | 0.342294 |
| 51 | 0.305106 | 0.352776 |
| 52 | 0.284572 | 0.170881 |
| 53 | 0.286045 | 0.236577 |
| 54 | 0.290577 | 0.418943 |
| 55 | 0.418943 | 0.453936 |
| 56 | 0.418943 | 0.374274 |
| 57 | 0.286613 | 0.392143 |
| 58 | 0.260565 | 0.338748 |
| 59 | 0.338748 | 0.336893 |
| 60 | 0.336893 | 0.334532 |
| 61 | 0.336893 | 0.331829 |
| 62 | 0.338748 | 0.376078 |
| 63 | 0.376078 | 0.311238 |
| 64 | 0.376078 | 0.403684 |
| 65 | 0.238365 | 0.245057 |
| 66 | 0.245057 | 0.178997 |
| 67 | 0.245057 | 0.256100 |
| 68 | 0.015044 | 0.001891 |

|    |           |           |
|----|-----------|-----------|
| 69 | 0.001891  | -0.010663 |
| 70 | -0.010663 | 0.036496  |
| 71 | 0.036496  | 0.076512  |
| 72 | 0.076512  | 0.181196  |
| 73 | 0.076512  | 0.077032  |
| 74 | 0.036496  | 0.030552  |
| 75 | -0.010663 | -0.039959 |
| 76 | -0.039959 | -0.056017 |
| 77 | -0.039959 | -0.052978 |
| 78 | 0.001891  | 0.082969  |
| 79 | 0.015044  | 0.036139  |
| 80 | -0.018373 | -0.068094 |
| 81 | -0.024700 | -0.203505 |
| 82 | -0.005325 | -0.037226 |
| 83 | -0.000002 | 0.177717  |
| 84 | 0.177717  | 0.204952  |
| 85 | 0.177717  | 0.175131  |

---
