# Supplementary material for: Revisiting the evolutionary trend toward the mammalian lower jaw in non-mammalian synapsids in a phylogenetic context
Source: PeerJ journal article supplement (doi:10.7717/peerj.15575), 2023-06-20
Supplement: Revise_PeerJ_Supplemental_Information_Table_S3.pdf [file Revise_PeerJ_Supplemental_Information_Table_S3.pdf]

Supplemental Information

**Table S3: Reconstructed ancestral states of Dentary Length 1 relative to the lower jaw at each node, which is numbered in Fig. S2.**

| Node | State at ancestor | State at node |
|------|-------------------|---------------|
| 3    | 0.000011          | 0.000725      |
| 4    | 0.000725          | 0.001161      |
| 5    | 0.001161          | 0.005968      |
| 6    | 0.005968          | 0.064351      |
| 7    | 0.064351          | 0.227070      |
| 8    | 0.227070          | 0.238887      |
| 9    | 0.238887          | 0.246977      |
| 10   | 0.246977          | 0.368072      |
| 11   | 0.368072          | 0.391975      |
| 12   | 0.391975          | 0.468007      |
| 13   | 0.468007          | 0.513335      |
| 14   | 0.513335          | 0.603403      |
| 15   | 0.603403          | 0.674703      |
| 16   | 0.674703          | 0.679960      |
| 17   | 0.679960          | 0.688935      |
| 18   | 0.688935          | 0.711293      |
| 19   | 0.711293          | 0.706582      |
| 20   | 0.706582          | 0.904600      |
| 21   | 0.706582          | 0.661800      |
| 22   | 0.711293          | 0.728000      |
| 23   | 0.688935          | 0.725500      |
| 24   | 0.679960          | 0.681600      |
| 25   | 0.674703          | 0.697000      |
| 26   | 0.603403          | 0.592000      |
| 27   | 0.513335          | 0.643600      |
| 28   | 0.468007          | 0.403531      |
| 29   | 0.403531          | 0.276500      |
| 30   | 0.403531          | 0.520400      |
| 31   | 0.391975          | 0.426938      |
| 32   | 0.426938          | 0.437489      |

|    |          |           |
|----|----------|-----------|
| 33 | 0.437489 | 0.552900  |
| 34 | 0.437489 | 0.315200  |
| 35 | 0.437489 | 0.474265  |
| 36 | 0.474265 | 0.561000  |
| 37 | 0.474265 | 0.457000  |
| 38 | 0.426938 | 0.512700  |
| 39 | 0.368072 | 0.236726  |
| 40 | 0.236726 | 0.167761  |
| 41 | 0.167761 | 0.150437  |
| 42 | 0.150437 | 0.157505  |
| 43 | 0.157505 | 0.149217  |
| 44 | 0.149217 | 0.119300  |
| 45 | 0.149217 | 0.146600  |
| 46 | 0.157505 | 0.253300  |
| 47 | 0.150437 | 0.020200  |
| 48 | 0.167761 | 0.133500  |
| 49 | 0.236726 | 0.323600  |
| 50 | 0.246977 | 0.247165  |
| 51 | 0.247165 | 0.236290  |
| 52 | 0.236290 | 0.199817  |
| 53 | 0.199817 | 0.108419  |
| 54 | 0.108419 | 0.167006  |
| 55 | 0.167006 | 0.173950  |
| 56 | 0.173950 | 0.168682  |
| 57 | 0.168682 | 0.176337  |
| 58 | 0.176337 | 0.180919  |
| 59 | 0.180919 | 0.104200  |
| 60 | 0.180919 | 0.242300  |
| 61 | 0.176337 | 0.120400  |
| 62 | 0.168682 | 0.134000  |
| 63 | 0.173950 | 0.324800  |
| 64 | 0.167006 | 0.396000  |
| 65 | 0.108419 | -0.493700 |
| 66 | 0.199817 | 0.200900  |
| 67 | 0.236290 | 0.387995  |
| 68 | 0.387995 | 0.410600  |
| 69 | 0.387995 | 0.384800  |

|     |           |           |
|-----|-----------|-----------|
| 70  | 0.247165  | 0.509800  |
| 71  | 0.238887  | 0.302792  |
| 72  | 0.302792  | 0.294253  |
| 73  | 0.294253  | 0.330600  |
| 74  | 0.294253  | 0.194800  |
| 75  | 0.302792  | 0.356035  |
| 76  | 0.356035  | 0.322300  |
| 77  | 0.356035  | 0.378400  |
| 78  | 0.227070  | 0.333463  |
| 79  | 0.333463  | 0.299405  |
| 80  | 0.299405  | 0.216100  |
| 81  | 0.299405  | 0.340200  |
| 82  | 0.333463  | 0.370630  |
| 83  | 0.370630  | 0.325204  |
| 84  | 0.325204  | 0.386400  |
| 85  | 0.325204  | 0.302500  |
| 86  | 0.370630  | 0.397300  |
| 87  | 0.064351  | 0.090575  |
| 88  | 0.090575  | 0.084665  |
| 89  | 0.084665  | 0.024874  |
| 90  | 0.024874  | 0.064230  |
| 91  | 0.064230  | 0.248800  |
| 92  | 0.064230  | 0.041300  |
| 93  | 0.024874  | 0.007300  |
| 94  | 0.084665  | 0.085049  |
| 95  | 0.085049  | 0.085600  |
| 96  | 0.085049  | 0.081900  |
| 97  | 0.090575  | 0.348600  |
| 98  | 0.064351  | 0.058000  |
| 99  | 0.005968  | -0.110700 |
| 100 | 0.001161  | -0.082300 |
| 101 | 0.000725  | 0.013700  |
| 102 | 0.000011  | -0.023817 |
| 103 | -0.023817 | 0.035600  |
| 104 | -0.023817 | -0.081000 |

---
