# Supplementary material for: Revisiting the evolutionary trend toward the mammalian lower jaw in non-mammalian synapsids in a phylogenetic context
Source: PeerJ journal article supplement (doi:10.7717/peerj.15575), 2023-06-20
Supplement: Revise_PeerJ_Supplemental_Information_Table_S4.pdf [file Revise_PeerJ_Supplemental_Information_Table_S4.pdf]

Supplemental Information

**Table S4: Reconstructed ancestral states of Dentary Length 2 relative to the lower jaw at each node, which is numbered in Fig. S3.**

| Node | State at ancestor | State at node |
|------|-------------------|---------------|
| 3    | -0.000001         | -0.000199     |
| 4    | -0.000199         | -0.000838     |
| 5    | -0.000838         | 0.005387      |
| 6    | 0.005387          | -0.013650     |
| 7    | -0.013650         | -0.024956     |
| 8    | -0.024956         | -0.027107     |
| 9    | -0.027107         | -0.029108     |
| 10   | -0.029108         | 0.041802      |
| 11   | 0.041802          | 0.054042      |
| 12   | 0.054042          | 0.130729      |
| 13   | 0.130729          | 0.152411      |
| 14   | 0.152411          | 0.194616      |
| 15   | 0.194616          | 0.267118      |
| 16   | 0.267118          | 0.274552      |
| 17   | 0.274552          | 0.285310      |
| 18   | 0.285310          | 0.332838      |
| 19   | 0.332838          | 0.332275      |
| 20   | 0.332275          | 0.324700      |
| 21   | 0.332275          | 0.332500      |
| 22   | 0.332838          | 0.340000      |
| 23   | 0.285310          | 0.297300      |
| 24   | 0.274552          | 0.278200      |
| 25   | 0.267118          | 0.288600      |
| 26   | 0.194616          | 0.177800      |
| 27   | 0.152411          | 0.215500      |
| 28   | 0.130729          | 0.113405      |
| 29   | 0.113405          | 0.137300      |
| 30   | 0.113405          | 0.076900      |
| 31   | 0.054042          | 0.065569      |
| 32   | 0.065569          | 0.072493      |

|    |           |           |
|----|-----------|-----------|
| 33 | 0.072493  | 0.184100  |
| 34 | 0.072493  | -0.119200 |
| 35 | 0.072493  | 0.134759  |
| 36 | 0.134759  | 0.154500  |
| 37 | 0.134759  | 0.162300  |
| 38 | 0.065569  | 0.086900  |
| 39 | 0.041802  | -0.020691 |
| 40 | -0.020691 | -0.033178 |
| 41 | -0.033178 | -0.044924 |
| 42 | -0.044924 | -0.045616 |
| 43 | -0.045616 | -0.055813 |
| 44 | -0.055813 | -0.181200 |
| 45 | -0.055813 | 0.027800  |
| 46 | -0.045616 | 0.033600  |
| 47 | -0.044924 | -0.116100 |
| 48 | -0.033178 | 0.012700  |
| 49 | -0.020691 | -0.063600 |
| 50 | -0.029108 | -0.035736 |
| 51 | -0.035736 | -0.046025 |
| 52 | -0.046025 | -0.073311 |
| 53 | -0.073311 | -0.113436 |
| 54 | -0.113436 | -0.124181 |
| 55 | -0.124181 | -0.125508 |
| 56 | -0.125508 | -0.129369 |
| 57 | -0.129369 | -0.152253 |
| 58 | -0.152253 | -0.152791 |
| 59 | -0.152791 | -0.208100 |
| 60 | -0.152791 | -0.141400 |
| 61 | -0.152253 | -0.177900 |
| 62 | -0.129369 | -0.115600 |
| 63 | -0.125508 | -0.126200 |
| 64 | -0.124181 | -0.165200 |
| 65 | -0.113436 | -0.184200 |
| 66 | -0.073311 | -0.214300 |
| 67 | -0.046025 | 0.023068  |
| 68 | 0.023068  | 0.048000  |
| 69 | 0.023068  | -0.017100 |

|     |           |           |
|-----|-----------|-----------|
| 70  | -0.035736 | 0.051200  |
| 71  | -0.027107 | -0.029667 |
| 72  | -0.029667 | -0.041858 |
| 73  | -0.041858 | -0.108800 |
| 74  | -0.041858 | 0.007800  |
| 75  | -0.029667 | 0.008772  |
| 76  | 0.008772  | 0.001400  |
| 77  | 0.008772  | 0.020000  |
| 78  | -0.024956 | -0.001070 |
| 79  | -0.001070 | -0.045921 |
| 80  | -0.045921 | -0.168400 |
| 81  | -0.045921 | 0.030100  |
| 82  | -0.001070 | 0.035678  |
| 83  | 0.035678  | 0.037079  |
| 84  | 0.037079  | -0.088500 |
| 85  | 0.037079  | 0.058000  |
| 86  | 0.035678  | 0.050200  |
| 87  | -0.013650 | -0.030953 |
| 88  | -0.030953 | -0.041429 |
| 89  | -0.041429 | 0.017806  |
| 90  | 0.017806  | 0.017628  |
| 91  | 0.017628  | 0.045800  |
| 92  | 0.017628  | 0.009400  |
| 93  | 0.017806  | 0.024400  |
| 94  | -0.041429 | -0.069312 |
| 95  | -0.069312 | -0.085100 |
| 96  | -0.069312 | -0.076800 |
| 97  | -0.030953 | -0.006200 |
| 98  | -0.013650 | -0.007100 |
| 99  | 0.005387  | 0.080600  |
| 100 | -0.000838 | -0.113100 |
| 101 | -0.000199 | -0.001700 |
| 102 | -0.000001 | 0.006588  |
| 103 | 0.006588  | 0.013400  |
| 104 | 0.006588  | 0.001200  |

---
