# Supplementary material for: Revisiting the evolutionary trend toward the mammalian lower jaw in non-mammalian synapsids in a phylogenetic context
Source: PeerJ journal article supplement (doi:10.7717/peerj.15575), 2023-06-20
Supplement: Revise_PeerJ_Supplemental_Information_Table_S5.pdf [file Revise_PeerJ_Supplemental_Information_Table_S5.pdf]

Supplemental Information

**Table S5: Estimates from PGLS regressions of the dentary length on the lower jaw length in which a trend model was assumed for trait evolution when the taxa lacking data on the dentary area were excluded from the analyses.**

| Explanatory variable | Estimate | SE    | t      | P      |
|----------------------|----------|-------|--------|--------|
| (A) Dentary Length 1 |          |       |        |        |
| Intercept            | -1.055   | 0.294 | -3.585 | <0.001 |
| Lower jaw length     | 0.993    | 0.052 | 19.191 | <0.001 |
| Trend                | 0.006    | 0.003 | 1.893  | 0.066  |
| (B) Dentary Length 2 |          |       |        |        |
| Intercept            | -0.359   | 0.124 | -2.885 | 0.006  |
| Lower jaw length     | 1.013    | 0.022 | 46.332 | <0.001 |
| Trend                | 0.000    | 0.001 | -0.057 | 0.955  |

(A) The Dentary Length 1 (log) was included as the response variable and the lower jaw length (log) and the trend were included as explanatory variables. (B) The Dentary Length 2 (log) was included as the response variable and the lower jaw length (log) and the trend were included as explanatory variables (see Fig. 1 for definitions of length measurements).
