# Supplementary material for: Revisiting the evolutionary trend toward the mammalian lower jaw in non-mammalian synapsids in a phylogenetic context
Source: PeerJ. 2023 Jun 20;11:e15575. doi: 10.7717/peerj.15575 (PMC10289081; doi:10.7717/peerj.15575)
Supplement: Supplemental Information 9 — Definitions of length measurements are shown in Fig. 1. [file peerj-11-15575-s009.xlsx]

## Sheet: Dataset S1
Supplemental Information
Dataset 1
List of the references for illustrations of the lower jaw of synapsid taxa used in this study.
Taxon	Reference
Aelurognathus tigriceps	Gebauer (2007)
Aerosaurus wellesi	Langston & Reisz (1981)
Anomocephalus africanus	Modesto et al. (1999)
Anteosaurus magnificus	Boonstra (1969)
Arctognathus curvimola	Kammerer (2015)
Bauria cynops	Brink (1963)
Biarmosuchus tener	Sigogneau-Russell & Tchudinov (1972)
Biseridens qilianicus	Liu et al. (2010)
Bocatherium mexicanum	Sidor (2003)
Chiniquodon	Kemp (2016)
Clelandina rubidgei	Gebauer (2007)
Cotylorhynchus romeri	Romer & Price (1940)
Ctenospondylus ninevehensis	Brink & Reisz (2004)
Dicynodon lacerticeps	Cluver & King (1983)
Dicynodontoides nowacki	Cluver & King (1983)
Diictodon	Cluver & King (1983)
Dimetrodon grandis	Brink & Reisz (2004)
Dimetrodon limbatus	Brink & Reisz (2004)
Dimetrodon milleri	Brink & Reisz (2004)
Dvinia prima	Tatarinov (1968)
Edaphosaurus boanerges	Modesto (1995)
Eodicynodon oosthuizeni	Rubidge (1990)
Euromycter rutenus	Sigogneau-Russel & Russel (1974)
Glanosuchus macrops	Boonstra (1969)
Hadrocodium wui	Luo et al. (2022)
Haptodus garnettensis	Kemp (2005)
Herpetoskylax hopsoni	Sidor & Rubidge (2006)
Hipposaurus boonstrai	Boonstra (1969)
Inostrancevia alexandri	Gebauer (2007)
Ischigualastia jenseni	Kemp (2005)
Jonkeria	Boonstra (1969)
Leontosaurus vanderhorsti	Kammerer (2016)
Lobalopex mordax	Sidor et al. (2004)
Lumkuia fuzzi	Hopson & Kitching (2001)
Lystrosaurus declivis	Kemp (2005)
Morganucodon	Kemp (2005)
Moschorhinus kitchingi	Durand (1991)
Olivierosuchus parringtoni	Kemp (2009)
Pristerodon	Cluver & King (1983)
Probainognathus jenseni	Romer (1970)
Proburnetia viatkensis	Rubidge & Sidor (2002)
Procynosuchus delaharpeae	Kemp (1979)
Secodontosaurus obtusidens	Brink & Reisz (2004)
Sinoconodon rigneyi‭	Luo et al. (2016)
Sphenacodon ferocior	Brink & Reisz (2004)
Suminia getmanovi	Rybczynski & Reisz (2001)
Sycosaurus nowaki	Kemp (1969)
Tetraceratops insignis	Kemp (2005)
Theriognathus microps	Huttenlocker & Abdala (2015)
Thrinaxodon liorhinus	Botha & Smith (2020)
Titanophoneus	Kemp (2009)
Ulemica invisa	Kemp (2005)
Ulemosaurus svijagensis	Kemp (2005)
References
Boonstra L. D. (1969). The fauna of the Tapinocephalus zone (Beaufort beds of the Karoo). Annals of the South African Museum, 56, 1–73.
Botha, J., & Smith, R. M. H. (2020). Biostratigraphy of the Lystrosaurus declivis Assemblage Zone (Beaufort Group, Karoo Supergroup), South Africa. South African Journal of Geology, 123, 207-216.
Brink, A. S. (1963). On Bauria cynops Broom. Palaeontologia Africana, 8, 39–56.
Brink, K. S., & Reisz, R. R. (2014). Hidden dental diversity in the oldest terrestrial apex predator Dimetrodon. Nature Communications, 5, 3269.
Cluver, M. A., & King, G. M. (1983). A reassessment of the relationships of Permian Dicynodontia (Reptilia, Therapsida) and a new classification of dicynodonts. Annals of the South African Museum, 91, 195–273.
Durand, J. F. (1991). A revised description of the skull of Moschorhinus (Therapsida, Therocephalia). Annals of the South African Museum, 99, 381–413.
Gebauer, E. V. (2007). Phylogeny and Evolution of the Gorgonopsia with a Special Reference to the Skull and Skeleton of GPIT-RE-7113 ('Aelurognathus?'Parringtoni). PhD thesis, Universität Tübingen.
Hopson, J. A., & Kitching, J. W. (2001). A probainognathian cynodont from South Africa and the phylogeny of nonmammalian cynodonts. Bulletin of the Museum of Comparative Zoology, 156, 5–35.
Huttenlocker, A. K., & Abdala, F. (2015). Revision of the first therocephalian, Theriognathus Owen (Therapsida: Whaitsiidae), and implications for cranial ontogeny and allometry in nonmammaliaform eutheriodonts. Journal of Paleontology, 89, 645–664.
Kammerer, C. F. (2015). Cranial osteology of Arctognathus curvimola, a short-snouted gorgonopsian from the late Permian of South Africa. Papers in Paleontology, 1, 41–58.
Kammerer, C. F. (2016). Systematics of the Rubidgeinae (Therapsida: Gorgonopsia). PeerJ, 4, e1608.
Kemp, T. S. (1969). On the functional morphology of the gorgonopsid skull. Philosophical Transactions of the Royal Society of London B, Biological Sciences, 256, 1–83.
Kemp, T. S. (1979). The primitive cynodont Procynosuchus: functional anatomy of the skull and relationships. Philosophical Transactions of the Royal Society of London. B, Biological Sciences, 285, 73–122.
Kemp, T. S. (2005). The origin and evolution of mammals. Oxford University Press.
Kemp, T. S. (2009). Phylogenetic interrelationships and pattern of evolution of the therapsids: testing for polytomy. Palaeontologica Africana, 44, 1–12.
Kemp, T. S. (2016). Non-mammalian synapsids: the beginning of the mammal line. In: Clack JA, Fay RR, Popper AN, eds. Evolution of the vertebrate ear–evidence from the fossil record. New York: Springer International Publishing, 107–137.
Langston Jr, W., & Reisz, R. R. (1981). Aerosaurus wellesi, new species, a varanopseid mammal-like reptile (Synapsida: Pelycosauria) from the Lower Permian of New Mexico. Journal of Vertebrate Paleontology, 1, 73–96.
Liu, J., Rubidge, B., & Li, J. (2010). A new specimen of Biseridens qilianicus indicates its phylogenetic position as the most basal anomodont. Proceedings of the Royal Society B: Biological Sciences, 277, 285–292.
Luo, Z., Bhullar, B. A. S., Crompton, A. W., Neander, A. I., & Rowe, T. B. (2022). Reexamination of the mandibular and dental morphology of the Early Jurassic mammaliaform Hadrocodium wui. Acta Palaeontologica Polonica, 67, 95–113.
Luo, Z-X., Schultz, J. A., & Ekdale, E. G. (2016). Evolution of the middle and inner ears of mammaliaforms: the approach to mammals. In: Clack JA, Fay RR, Popper AN, eds. Evolution of the vertebrate ear–evidence from the fossil record. New York: Springer International Publishing, 139–174
Modesto, S. P. (1995). The skull of the herbivorous synapsid Edaphosaurus boanerges from the Lower Permian of Texas. Palaeontology, 38, 213.
Modesto, S., Rubidge, B., & Welman, J. (1999). The most basal anomodont therapsid and the primacy of Gondwana in the evolution of the anomodonts. Proceedings of the Royal Society of London. Series B: Biological Sciences, 266, 331–337.
Romer, A. S. (1970). The Chañares (Argentina) Triassic reptile fauna. VI. A chiniquodontid cynodont with incipient squamosal-dentary jaw articulation. Breviora, 344, 1–18.
Romer, A. S., & Price, L. W. (1940). Review of the Pelycosauria. Geological Society of America, 28.
Rubidge, B. S. (1990). Redescription of the cranial morphology of Eodicynodon oosthuizeni (Therapsida; Dicynodontia). Navorsinge van die Nasionale Museum: Researches of the National Museum, 7, 1–25.
Rubidge, B. S., & Sidor, C. A. (2002). On the cranial morphology of the basal therapsids Burnetia and Proburnetia (Therapsida: Burnetiidae). Journal of Vertebrate Paleontology, 22, 257–267.
Rybczynski, N., & Reisz, R. R. (2001). Earliest evidence for efficient oral processing in a terrestrial herbivore. Nature, 411, 684–687.
Sidor, C. A. (2003). Evolutionary trends and the origin of the mammalian lower jaw. Paleobiology, 29, 605–640.
Sidor, C. A., & Rubidge, B. S. (2006). Herpetoskylax hopsoni, a new biarmosuchian (Therapsida: Biarmosuchia) from the Beaufort Group of South Africa. Amniote paleobiology: Perspectives on the evolution of mammals, birds, and reptiles, 76–113.
Sidor, C. A., Hopson, J. A., & Keyser, A. W. (2004). A new burnetiamorph therapsid from the Teekloof Formation, Permian, of South Africa. Journal of Vertebrate Paleontology, 24, 938–950.
Sigogneau, D., & Tchudinov, P. K. (1972). Reflections on some Russian eotheriodonts (Reptilia, Synapsida, Therapsida). Palaovertebrata, 5, 79–109.
Sigogneau–Russell, D., & Russell, D. E. (1974). Étude du premier caséidé (Reptilia, Pelycosauria) d’Europe occidentale. Bulletin du Muséum national d'Histoire naturelle, 230, 145–216.
Tatarinov, L. P. (1968). Morphology and systematics of the northern Dvina cynodonts (Reptilia, Therapsida; Upper Permian). Peabody Museum of Natural History.
